# Supplementary material for: Cigarette smoking and PM2.5 might jointly exacerbate the risk of metabolic syndrome
Source: Frontiers journal article supplement (doi:10.3389/fpubh.2023.1234799), 2024-01-15
Supplement: Data_Sheet_1.pdf [file Data_Sheet_1.pdf]

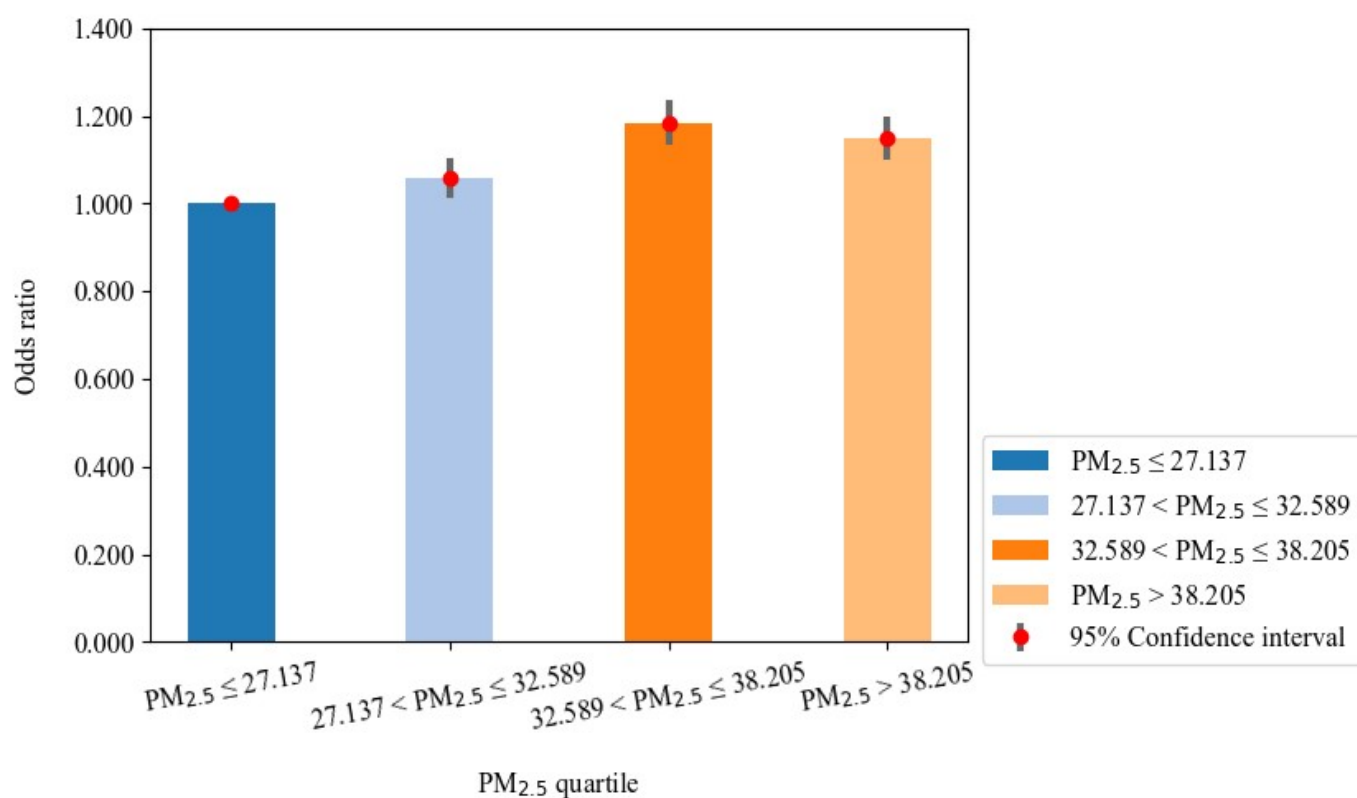

**Supplementary figure 1. Association between PM<sub>2.5</sub> and metabolic syndrome**

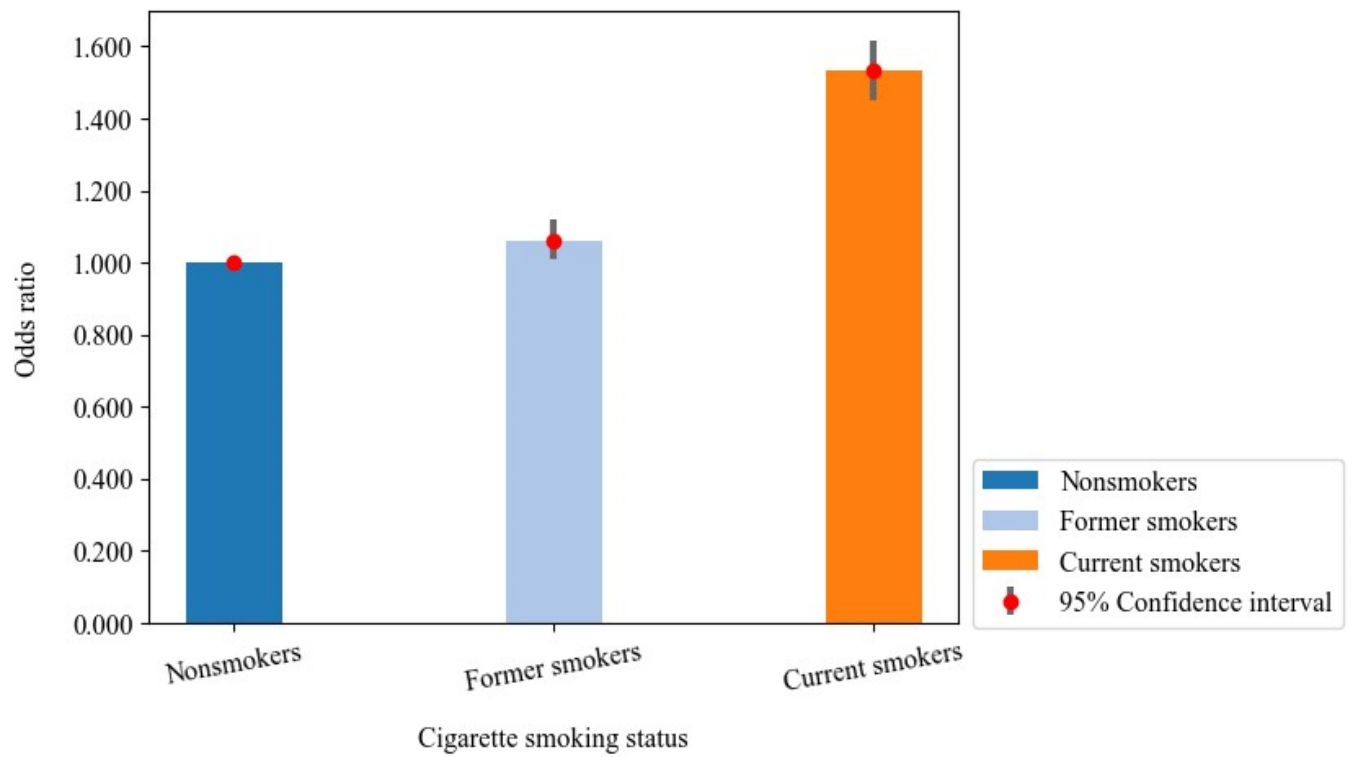

**Supplementary figure 2. Association between cigarette smoking and metabolic syndrome**

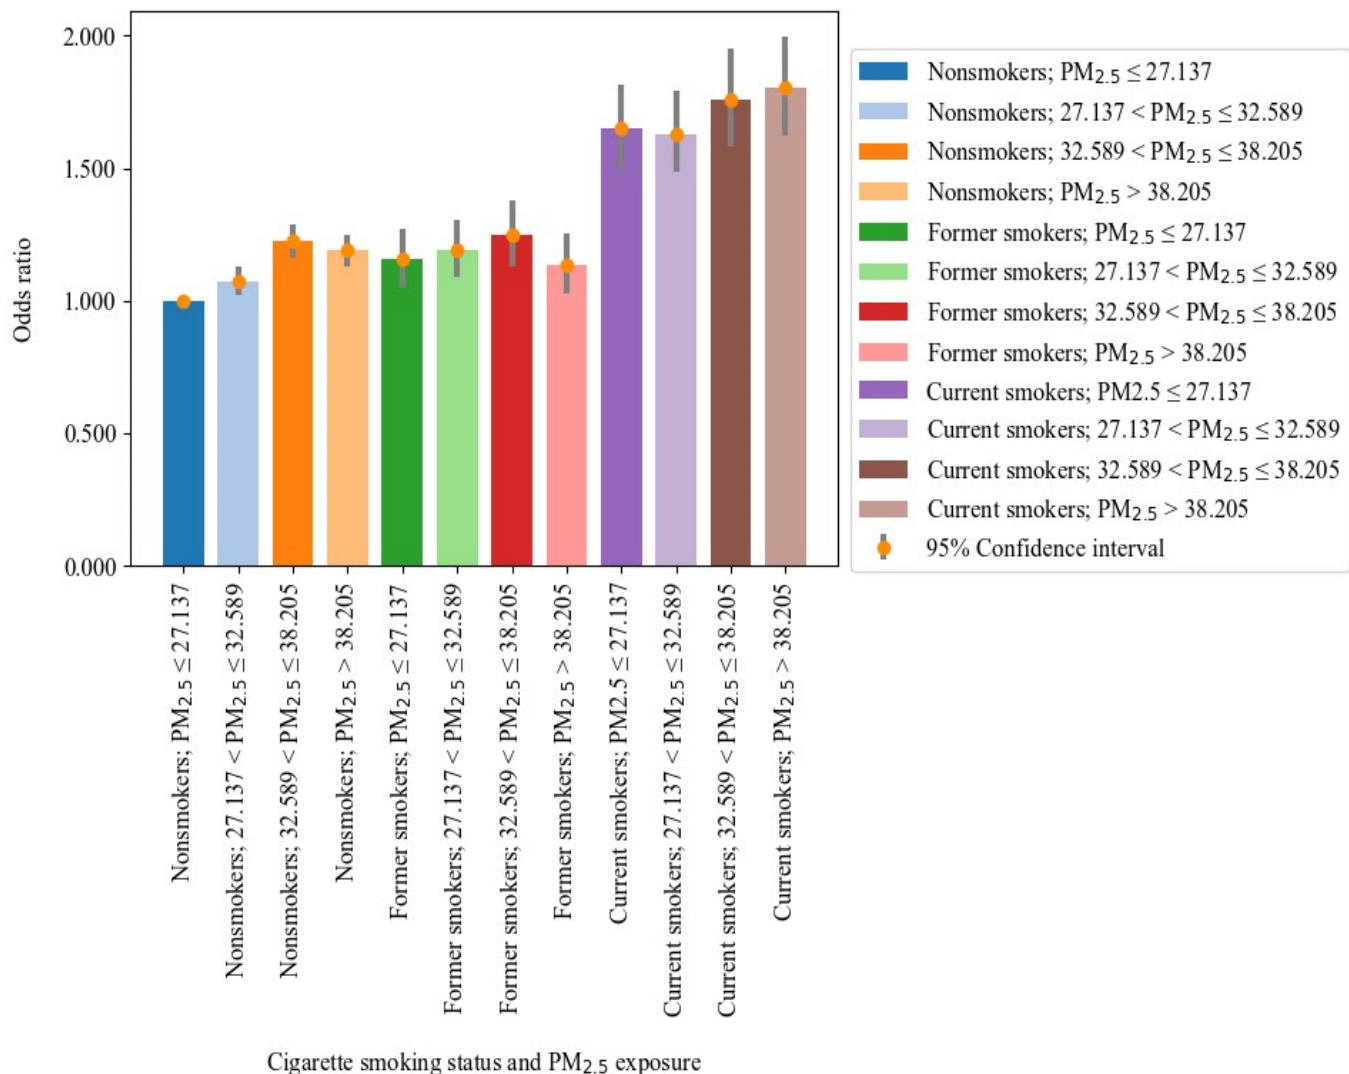

**Supplementary figure 3. Risk of metabolic syndrome based on a combination of cigarette smoking and PM<sub>2.5</sub> exposure**

**Table S1. Association between the number of cigarettes smoked per week and metabolic syndrome in former and current smokers.**

| Variables                            | Former smokers |             |         | Current smokers |             |         | Current and former smokers |             |         |
|--------------------------------------|----------------|-------------|---------|-----------------|-------------|---------|----------------------------|-------------|---------|
|                                      | OR             | 95% CI      | P-value | OR              | 95% CI      | P-value | OR                         | 95% CI      | P-value |
| Number of cigarettes smoked per week |                |             |         |                 |             |         |                            |             |         |
| <42                                  | 1              |             |         |                 |             |         |                            |             |         |
| ≥42 to <70                           | 1.129          | 0.904-1.411 | 0.2846  | 1.082           | 0.886-1.321 | 0.4398  | 1.114                      | 0.961-1.291 | 0.1521  |
| ≥70 to <140                          | 0.985          | 0.859-1.129 | 0.8288  | 1.142           | 1.003-1.301 | 0.0448  | 1.073                      | 0.977-1.178 | 0.1408  |
| ≥140                                 | 1.285          | 1.144-1.444 | <0.0001 | 1.603           | 1.415-1.817 | <0.0001 | 1.359                      | 1.249-1.478 | <0.0001 |

Adjusted for PM<sub>2.5</sub>, sex, age, BMI, alcohol intake status, exercise, marital status, educational level, secondhand smoke exposure, and duration of residence.

OR, odds ratio; CI, confidence interval; ref., reference; BMI, body mass index.
